# Supplementary material
Source: PubMed Central journal article supplement (PMC3262129)
Supplement: mmc1.pdf [file mmc1.pdf]

**Molecular Cell, Volume 45**

**Supplemental Information**

**RNase H and Postreplication Repair Protect Cells  
from Ribonucleotides Incorporated in DNA**

**Federico Lazzaro, Daniele Novarina, Flavio Amara, Danielle L. Watt, Jana E. Stone,  
Vincenzo Costanzo, Peter M. Burgers, Thomas A. Kunkel, Paolo Plevani, and Marco  
Muzi-Falconi**

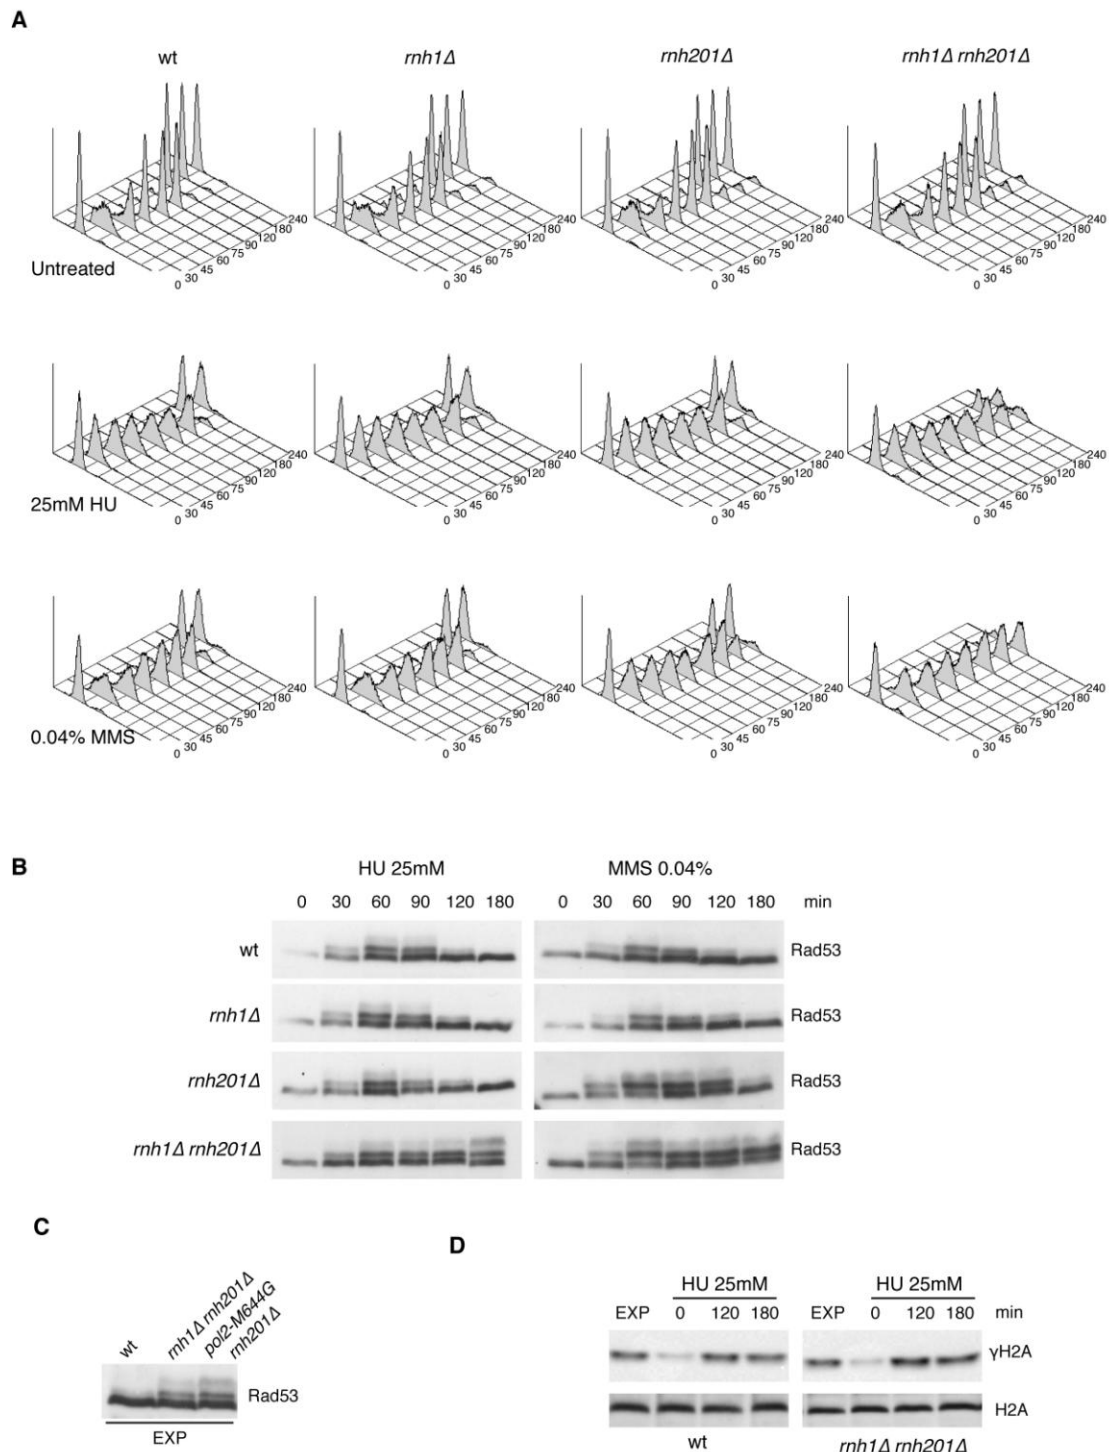

**Figure S1, Related to Figure 1. Lack of RNase H Causes Replication Stress and a G2-M Delay**

(A) Exponentially growing yeast cultures were arrested in G1 phase with  $\alpha$ -factor. Cells were released in the presence of 25 mM HU, 0.04% MMS or fresh medium, and cell cycle progression was analyzed by FACS. The figure shows the number of cells in relation to the DNA content.

(B–D) The same cultures were used to verify checkpoint activation at the indicated time-points after the release. Total cell extracts were analyzed by western blotting to monitor Rad53, H2A and H2A phosphorylation, using specific antibodies.

Lazzaro et al., Figure S2

**A**

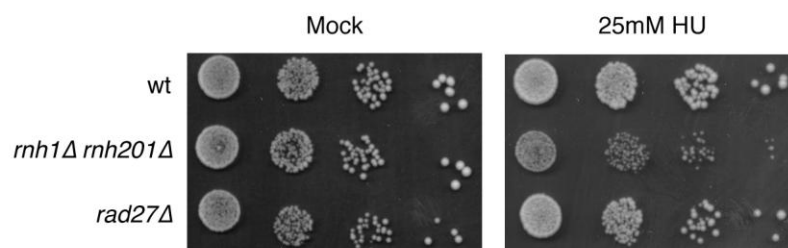

**B**

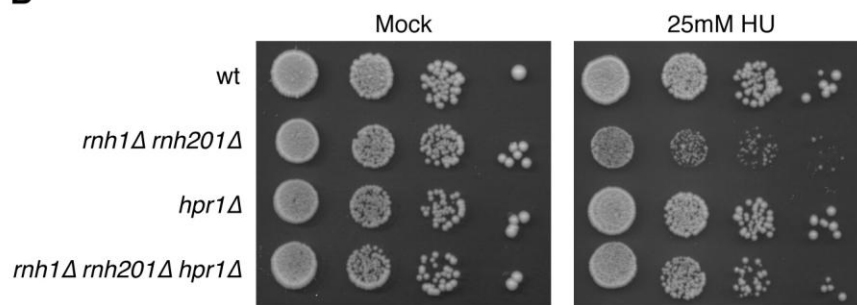

**Figure S2, Related to Figure 1. Sensitivity to Replication Stress in RNase H Mutant Cells Is Unlinked from Defective Okazaki Fragments or R-Loops Processing**

To verify the effect of mutants defective in processing of Okazaki fragments (A) or R-loops (B) on HU sensitivity, ten-fold serial dilutions of yeast overnight cultures were spotted on YPD plates containing a sublethal HU dose or mock. Ability to grow was analyzed after 3 days incubation.

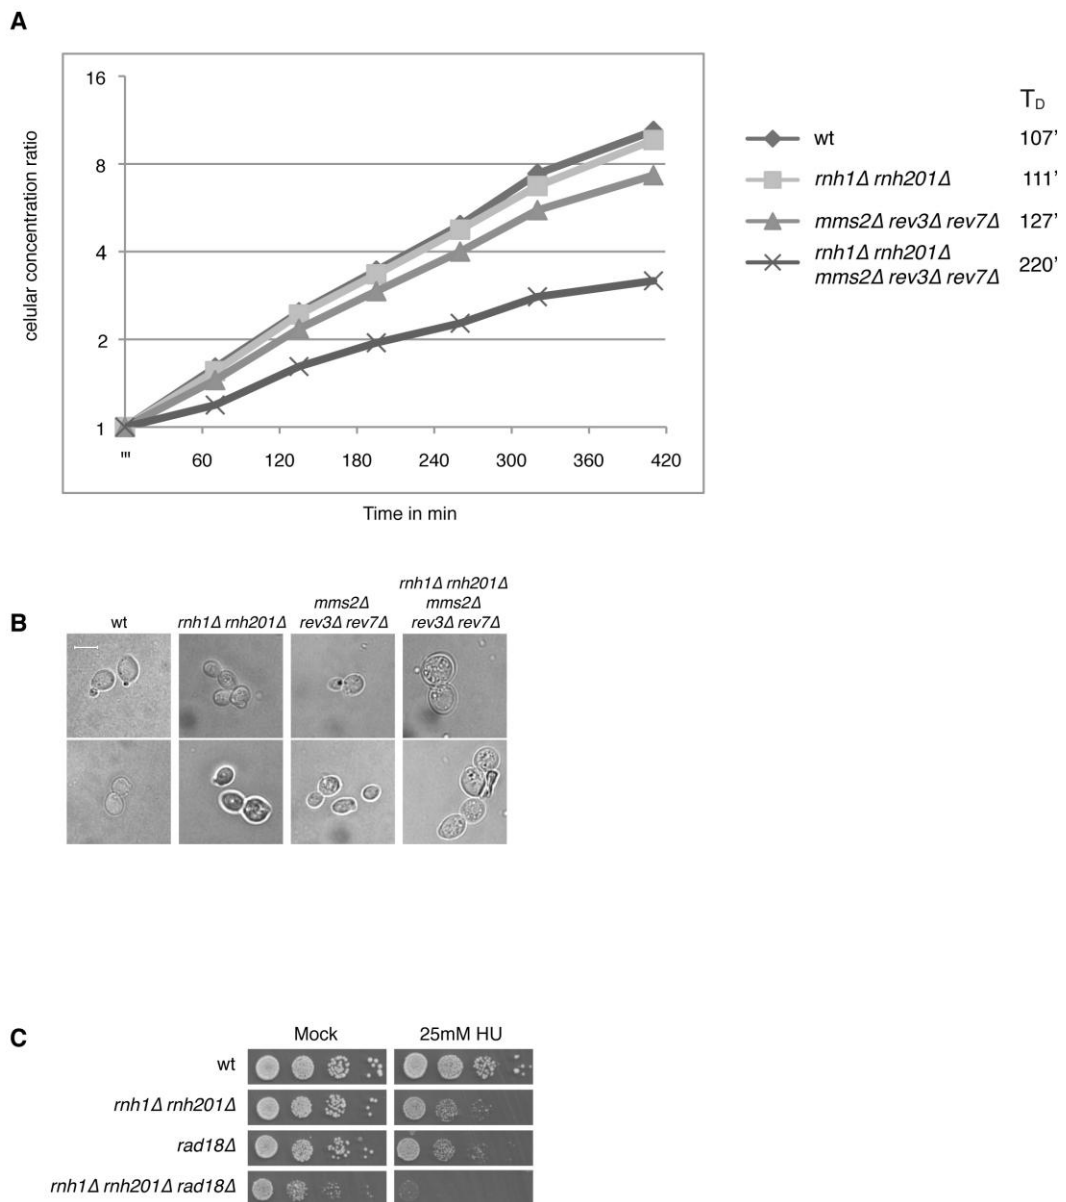

**Figure S3, Related to Figure 5. PRR Pathways Play a Crucial Role in the Survival of RNase H-Defective Cells**

(A) Growth curves and duplication times ( $T_D$ ) for exponentially growing cells of the indicated strains were obtained by measuring cell concentrations at different time-points.

(B) The shape and size of wt and mutant cells from exponentially growing cultures were visualized by microscopic analysis. The white bar represents 5 $\mu$ m.

(C) To test the effect on HU sensitivity of a mutation eliminating Rad18, the enzyme responsible for conjugation of ubiquitin to PCNA, ten-fold serial dilutions of yeast overnight cultures were spotted on YPD plates containing a sublethal HU dose or mock. Ability to grow was analyzed after 3 days incubation.

Lazzaro et al. Figure S4

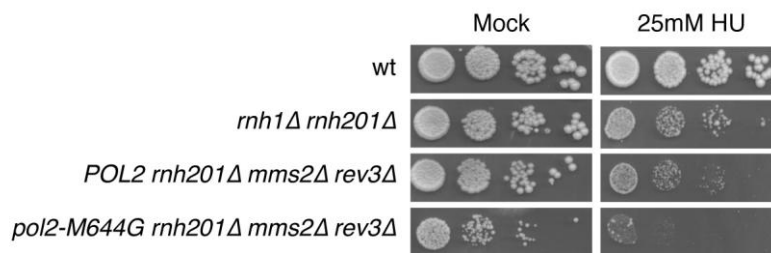

**Figure S4, Related to Figure 5. PRR Is Crucial for Cells that Accumulate rNMP in Their Chromosomes**

To verify the effect of PRR dysfunction in strains where a mutated DNA polymerase  $\epsilon$  incorporates elevated levels of rNMPs in genomic DNA, ten-fold serial dilutions of yeast overnight cultures were spotted on YPD plates containing a sublethal HU dose or mock. Ability to grow was analyzed after 3 days incubation.

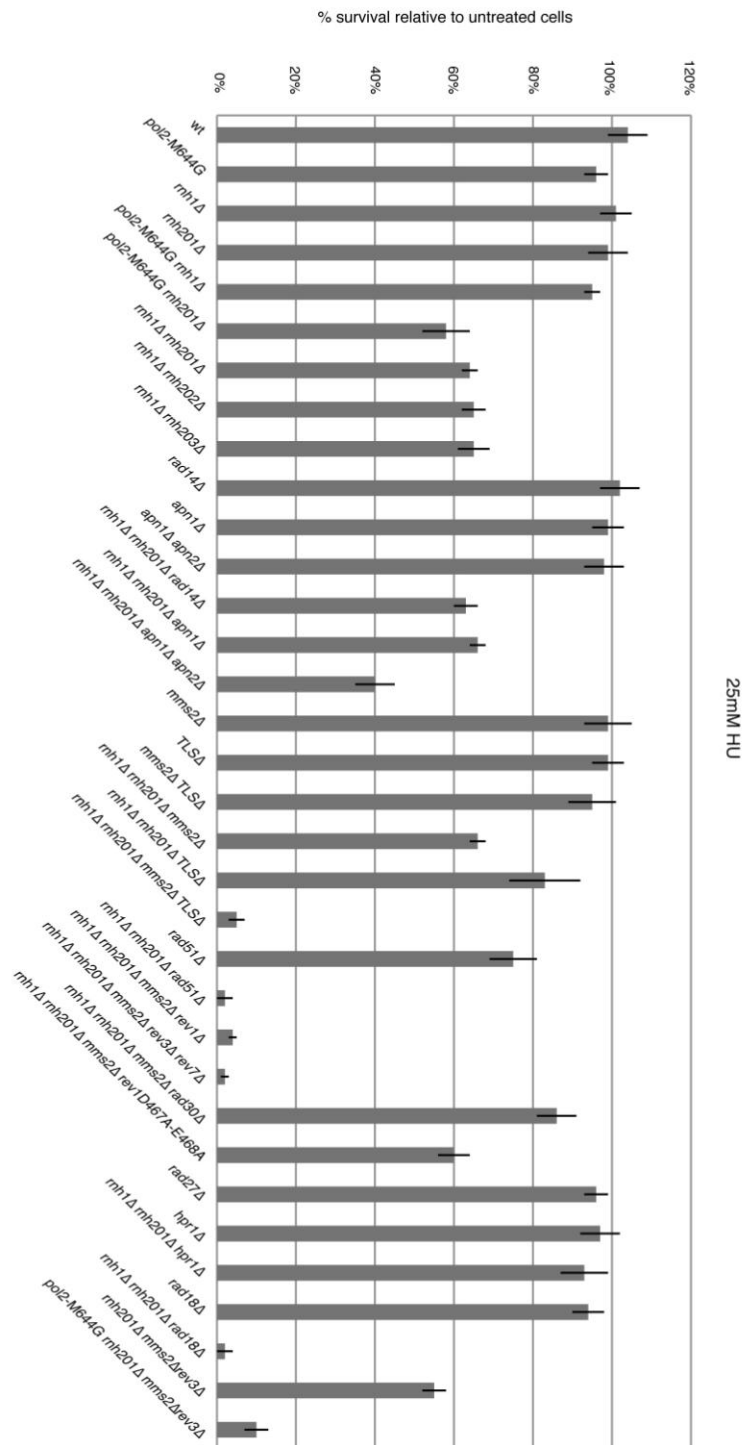

**Figure S5, Related to Figures 1–3. Quantitative Survival Assays**

To obtain quantitative data on survival upon treatment with 25 mM HU of the yeast strains used throughout this work, survival assays were performed as described in the legend to Figure 1H.

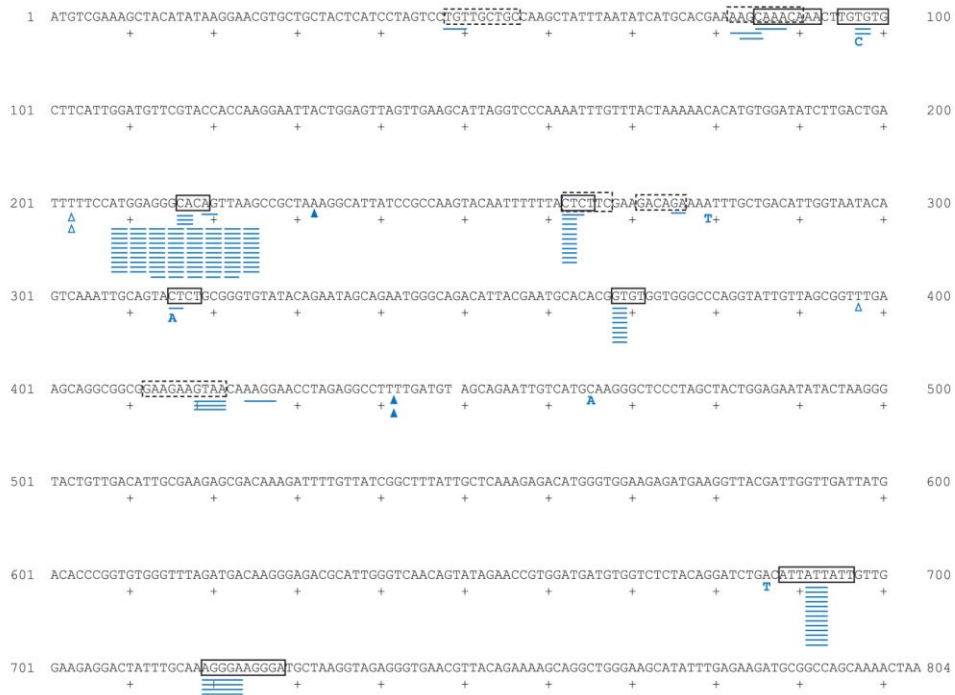

### Figure S6, Related to Figure 4. Mutational Spectrum in *pol2-M644G rnh201Δ rev3Δ* Strain

The coding strand of the 804-base-pair *URA3* open reading frame is shown. The sequence changes observed in independent 5-FOA resistant mutants are depicted in blue below coding sequence, for *URA3* in orientation 2 as described in (Nick McElhinny, 2010a). Letters indicate single-base substitutions, closed triangles indicate single-base additions, open triangles indicate single-base deletions and short lines below the coding sequence indicate 2–5-base deletions. Solid boxes enclose perfect direct repeat sequences, and dashed boxes enclose imperfect direct repeat sequences. Among 163 total mutants sequenced, a few contained other sequences changes not depicted here.

**Table S1. Strains Used in This Study**

| <b>Strain name</b> | <b>Genotype</b>                                                                                      | <b>Source/ Reference</b> |
|--------------------|------------------------------------------------------------------------------------------------------|--------------------------|
| SY2080             | <i>MATa ade2-1 trp1-1 leu2-3,112 his3-11,15 ura3-1 can1-100 RAD5</i>                                 | M. Foiani                |
| YFL1208            | (SY2080) <i>rnh1::HIS3</i>                                                                           | This study               |
| YFL1191            | (SY2080) <i>rnh201::KanMX6</i>                                                                       | This study               |
| YFL1193            | (SY2080) <i>rnh202::KanMX6</i>                                                                       | This study               |
| YFL1196            | (SY2080) <i>rnh203::KanMX6</i>                                                                       | This study               |
| YFL1213            | (SY2080) <i>rnh1::HIS3 rnh201::KanMX6</i>                                                            | This study               |
| YFL1216            | (SY2080) <i>rnh1::HIS3 rnh202::KanMX6</i>                                                            | This study               |
| YFL1218            | (SY2080) <i>rnh1::HIS3 rnh203::KanMX6</i>                                                            | This study               |
| YMIC5A3            | <i>MATa ade2-1 trp1-1 leu2-3,112 his3-11,15 ura3-1 can1-100 rad5-535 mec1-1 sml1</i>                 | Sabbioneda, 2007         |
| YFL1449            | (SY2080) <i>pol2M644G</i>                                                                            | This study               |
| YFL1474            | (SY2080) <i>pol2M644G rnh201::KanMX6</i>                                                             | This study               |
| YMG1146            | (SY2080) <i>mms2::HPH</i>                                                                            | This study               |
| YMG1082            | (SY2080) <i>rad30::KanMX6 rev1::KanMX6 rev3::TRP1 rev7::HIS3</i>                                     | Giannattasio, 2010       |
| YMG1149            | (SY2080) <i>rad30::KanMX6 rev1::KanMX6 rev3::TRP1 rev7::HIS3 mms2::HPH</i>                           | This study               |
| YFL1265            | (SY2080) <i>rnh1::HIS3 rnh201::KanMX6 mms2::HPH</i>                                                  | This study               |
| YFL1271            | (SY2080) <i>rad30::KanMX6 rev1::KanMX6 rev3::TRP1 rev7::HIS3 rnh1::HIS3 rnh201::KanMX6</i>           | This study               |
| YFL1294            | (SY2080) <i>rad30::KanMX6 rev1::KanMX6 rev3::TRP1 rev7::HIS3 rnh1::HIS3 rnh201::KanMX6 mms2::HPH</i> | This study               |
| YFL1331            | (SY2080) <i>rev1::KanMX6 rnh1::HIS3 rnh201::KanMX6 mms2::HPH</i>                                     | This study               |
| YFL1330            | (SY2080) <i>rev3::TRP1 rev7::HIS3 rnh1::HIS3 rnh201::KanMX6 mms2::HPH</i>                            | This study               |
| YFL1341            | (SY2080) <i>rad30::KanMX6 rnh1::HIS3 rnh201::KanMX6 mms2::HPH</i>                                    | This study               |
| YFL1574            | (SY2080) <i>rev1::KanMX6 rnh1::HIS3 rnh201::KanMX6 mms2::HPH ura3:REV1:URA3</i>                      | This study               |
| YFL1575            | (SY2080) <i>rev1::KanMX6 rnh1::HIS3 rnh201::KanMX6 mms2::HPH ura3:rev1-D467A-D468A:URA3</i>          | This study               |
| YFL1376            | (SY2080) <i>leu2::<sup>6xHIS</sup>POL30:LEU2</i>                                                     | This study               |
| YFL1377            | (SY2080) <i>leu2::<sup>6xHIS</sup>POL30:LEU2 rnh1::HIS3 rnh201::KanMX6</i>                           | This study               |
| YMG649             | (SY2080) <i>rad27::KanMX6</i>                                                                        | This study               |
| YNOV59             | (SY2080) <i>hpr1::HIS3</i>                                                                           | This study               |
| YNOV61             | (SY2080) <i>rnh1::HIS3 rnh201::KanMX6 hpr1::HIS3</i>                                                 | This study               |
| YFL1671            | (SY2080) <i>rnh201::KanMX6 mms2::HPH rev3::TRP1</i>                                                  | This study               |



|                                |                                                                                        |                       |
|--------------------------------|----------------------------------------------------------------------------------------|-----------------------|
| YFL1687                        | (SY2080) <i>rnh201::KanMX6 mms2::HPH rev3::TRP1 pol2-M644G</i>                         | This study            |
| YFL1580                        | (SY2080) <i>rad18::KanMX6</i>                                                          | This study            |
| YFL1629                        | (SY2080) <i>rad18::KanMX6 rnh1::HIS3 rnh201::KanMX6</i>                                | This study            |
| ( $\Delta$ )(-2)  -7B-YUNI300) | MATa CAN1 his7-2 leu2::kanMX ura3- $\Delta$ trp1-289 ade2-1 lys2- $\Delta$ GG2899-2900 | Nick McElhinny, 2010a |
| SNM77                          | ( $\Delta$ )(-2)  -7B-YUNI300) URA3-OR2 <i>pol2-M644G</i>                              | Nick McElhinny, 2010a |
| SNM127                         | ( $\Delta$ )(-2)  -7B-YUNI300) URA3-OR2 <i>pol2-M644G rnh201::HPH</i>                  | Nick McElhinny, 2010a |
| JES184                         | ( $\Delta$ )(-2)  -7B-YUNI300) URA3-OR2 <i>pol2-M644G rnh201::HPH rev3::LEU2</i>       | This study            |
| YFL1541                        | (SY2080) <i>rad14::NATr</i>                                                            | This study            |
| YFL1545                        | (SY2080) <i>rad14::NATr rnh1::HIS3 rnh201::KanMX6</i>                                  | This study            |
| YFL1511                        | (SY2080) <i>apn1::HPH</i>                                                              | This study            |
| YFL1537                        | (SY2080) <i>apn1::HPH apn2::TRP1</i>                                                   | This study            |
| YFL1531                        | (SY2080) <i>apn1::HPH apn2::TRP1 rnh1::HIS3 rnh201::KanMX6</i>                         | This study            |
| YNOV162                        | (SY2080) <i>rad51::HPH</i>                                                             | This study            |
| YFL1451                        | (SY2080) <i>pol2-M644G rnh1::HIS3</i>                                                  | This study            |
| YFL1677                        | (SY2080) <i>rad51::HPH rnh1::HIS3 rnh201::KanMX6</i>                                   | This study            |
